# Supplementary material for: Plant competition cues activate a singlet oxygen signaling pathway in Arabidopsis thaliana
Source: Front Plant Sci. 2024 Aug 20;15:964476. doi: 10.3389/fpls.2024.964476 (PMC11368760; doi:10.3389/fpls.2024.964476)
Supplement: Supplementary Table 1 — Incoming and reflected light spectral composition in the weed-free control, biological low R:FR and artificial low R:FR treatments. [file Table1.xlsx]

## Sheet: Sheet1
Light composition in the weed-free control, biological, and artificial low R:FR treatments was measured by a LI-COR 180 spectrometer.
Measurements were taken in 9 locations across each treatment.
The R:FR ratios were calculated by dividing the photon flux density of red by photon flux density of far-red.
PPFD: photosynthetic photon flux density (μmol/m²/s); PFD-B: photon flux density blue; PFD-G: photon flux density green; PFD-R: photon flux density red; PFD: photon flux density; PFD-UV: photon flux density ultraviolet; PFD-FR: photon flux density far-red; R/FR: red to far-red ratio
Summary
	PPFD		PFD-B		PFD-G		PFD-R		PFD		PFD-UV		PFD-FR		R/FR
Treatment	Incoming	Reflected	Incoming	Reflected	Incoming	Reflected	Incoming	Reflected	Incoming	Reflected	Incoming	Reflected	Incoming	Reflected	Incoming	Reflected
Weed-free control	160.733	11.9593	32.76	1.88989	69.2956	5.62578	59.4833	4.509	178.322	14.6426	0.639589	0.0368111	17.2856	2.67222	3.45435	1.63625
Biological low R:FR	161.478	4.06122	32.7578	0.430144	69.7878	2.36189	59.7389	1.28578	181.611	7.85244	0.750856	0.0210333	19.7278	3.783	3.06543	0.34231
Artificial low R:FR	174.922	9.12378	34.94	1.34479	73.7278	4.41744	67.08	3.40344	256.022	21.5989	0.812867	0.0422111	80.8922	12.4703	0.850465	0.272705
Detail
	PPFD		PFD-B		PFD-G		PFD-R		PFD		PFD-UV		PFD-FR		R/FR
Treatment	Incoming	Reflected	Incoming	Reflected	Incoming	Reflected	Incoming	Reflected	Incoming	Reflected	Incoming	Reflected	Incoming	Reflected	Incoming	Reflected
Weed-free control 1	150.3	14.66	30.56	2.536	65	6.724	55.43	5.47	165.1	17.2	0.5451	0.0431	14.63	2.532	3.78879	2.16035
Weed-free control 2	159.5	11.17	32.54	1.849	68.9	5.28	58.86	4.091	175.5	13.57	0.6189	0.032	15.73	2.396	3.74189	1.70743
Weed-free control 3	167.5	11.36	34.16	1.817	72.27	5.395	61.92	4.199	185	13.8	0.6774	0.0311	17.17	2.435	3.60629	1.72444
Weed-free control 4	174.6	10	35.6	1.582	75.23	4.72	64.59	3.75	193.7	12.3	0.7022	0.0302	18.83	2.291	3.43016	1.63684
Weed-free control 5	187.6	11.53	38.19	1.78	80.92	5.459	69.45	4.419	208.9	14.23	0.7394	0.0324	20.95	2.693	3.31504	1.64092
Weed-free control 6	165.9	9.148	33.95	1.356	71.56	4.465	61.26	3.371	185.4	11.8	0.6406	0.0275	19.15	2.641	3.19896	1.27641
Weed-free control 7	140.4	7.827	28.55	1.171	60.39	3.836	52.19	2.857	156.7	10.23	0.5519	0.0238	16	2.395	3.26187	1.1929
Weed-free control 8	132.8	6.909	26.91	1.055	57.22	3.353	49.37	2.535	147.7	8.913	0.4974	0.0224	14.6	1.997	3.38151	1.2694
Weed-free control 9	168	25.03	34.38	3.863	72.17	11.4	62.28	9.889	186.9	29.74	0.7834	0.0888	18.51	4.67	3.36467	2.11756
Average	160.733	11.9593	32.76	1.88989	69.2956	5.62578	59.4833	4.509	178.322	14.6426	0.639589	0.0368111	17.2856	2.67222	3.45435	1.63625
	PPFD		PFD-B		PFD-G		PFD-R		PFD		PFD-UV		PFD-FR		R/FR
Treatment	Incoming	Reflected	Incoming	Reflected	Incoming	Reflected	Incoming	Reflected	Incoming	Reflected	Incoming	Reflected	Incoming	Reflected	Incoming	Reflected
Biologica low R:FR light 1	154.4	5.366	31.49	0.5682	66.84	3.14	56.81	1.68	171.1	9.344	0.662	0.0217	16.42	3.972	3.45981	0.422961
Biologica low R:FR light 2	147.6	3.791	30.01	0.3881	63.91	2.242	54.42	1.176	163	6.93	0.6777	0.0184	15.01	3.132	3.62558	0.375479
Biologica low R:FR light 3	164.2	3.704	33.29	0.3935	71.05	2.17	60.68	1.155	183.3	6.695	0.7869	0.0211	18.61	2.982	3.26061	0.387324
Biologica low R:FR light 4	177.2	4.07	36.02	0.4395	76.62	2.352	65.46	1.296	199.2	7.807	0.8678	0.0219	21.47	3.728	3.04891	0.347639
Biologica low R:FR light 5	147.8	3.894	29.8	0.3997	64	2.298	54.78	1.212	169.2	8.371	0.7052	0.0213	21.02	4.469	2.60609	0.271202
Biologica low R:FR light 6	164.8	3.176	33.39	0.3392	71.13	1.829	61.08	1.021	186.9	6.648	0.7551	0.019	21.74	3.463	2.80957	0.294831
Biologica low R:FR light 7	190.9	4.409	38.71	0.4864	82.49	2.516	70.65	1.424	216.5	8.809	0.9074	0.023	25.08	4.391	2.81699	0.3243
Biologica low R:FR light 8	153.7	4.519	31.15	0.4892	66.13	2.584	57.15	1.465	172.6	8.667	0.6901	0.0224	18.6	4.139	3.07258	0.35395
Biologica low R:FR light 9	152.7	3.622	30.96	0.3675	65.92	2.126	56.62	1.143	172.7	7.401	0.7055	0.0205	19.6	3.771	2.88878	0.303103
Average	161.478	4.06122	32.7578	0.430144	69.7878	2.36189	59.7389	1.28578	181.611	7.85244	0.750856	0.0210333	19.7278	3.783	3.06543	0.34231
	PPFD		PFD-B		PFD-G		PFD-R		PFD		PFD-UV		PFD-FR		R/FR
Treatment	Incoming	Reflected	Incoming	Reflected	Incoming	Reflected	Incoming	Reflected	Incoming	Reflected	Incoming	Reflected	Incoming	Reflected	Incoming	Reflected
Artificial low R:FR light 1	162.5	13.34	32.39	2.039	68.5	6.325	62.44	5.037	237.7	28.67	0.6777	0.0512	75	15.33	0.832533	0.328571
Artificial low R:FR light 2	154.4	9.36	30.63	1.357	65.44	4.541	59.06	3.505	209.9	20.71	0.6744	0.0392	55.26	11.34	1.06877	0.309083
Artificial low R:FR light 3	165.9	8.468	33.05	1.226	70.15	4.097	63.46	3.184	229.3	20.37	0.7436	0.0385	63.21	11.9	1.00396	0.267563
Artificial low R:FR light 4	191.5	8.517	38.35	1.233	80.33	4.109	73.78	3.214	303.3	21.04	0.9358	0.044	111.6	12.52	0.661111	0.256709
Artificial low R:FR light 5	187.9	9.653	37.57	1.434	79.16	4.642	72.05	3.622	271	23.45	0.8686	0.0442	82.86	13.8	0.869539	0.262464
Artificial low R:FR light 6	193.6	9.949	38.84	1.482	81.48	4.836	74.19	3.677	284.7	25.18	0.8942	0.0486	90.93	15.22	0.815902	0.24159
Artificial low R:FR light 7	169	8.575	33.75	1.268	71.33	4.185	64.68	3.161	247.7	20.72	0.8079	0.0403	78.51	12.14	0.823844	0.260379
Artificial low R:FR light 8	174.1	8.308	34.73	1.216	73.15	4.085	67.04	3.045	265.5	20.35	0.8596	0.0415	91.2	12.03	0.735088	0.253117
Artificial low R:FR light 9	175.4	5.944	35.15	0.8481	74.01	2.937	67.02	2.186	255.1	13.9	0.854	0.0324	79.46	7.953	0.843443	0.274865
Average	174.922	9.12378	34.94	1.34479	73.7278	4.41744	67.08	3.40344	256.022	21.5989	0.812867	0.0422111	80.8922	12.4703	0.850465	0.272705
