# Supplementary material for: Plant competition cues activate a singlet oxygen signaling pathway in Arabidopsis thaliana
Source: Front Plant Sci. 2024 Aug 20;15:964476. doi: 10.3389/fpls.2024.964476 (PMC11368760; doi:10.3389/fpls.2024.964476)
Supplement: Supplementary Table 3 — Image analysis of leaf cell death in GSH-treated Arabidopsis plants in the weed-free control, biological low R:FR and artificial low R:FR treatments. [file Table3.xlsx]

## Sheet: Sheet1
Analysis of GSH-induced cell death by Fiji for 16 independent images of Arabidopsis plants taken per each GSH concentartion in the weed-free control, biological and artificial low R:FR light treatments
For each image, the background was first removed and total leaf area, and green leaf area were determined in Fiji. The dead leaf area was then calculated by subtracting the green leaf area from the total leaf area and expressed as percentage of dead leaf area
		Weed-free control, MES buffer							Weed-free control, 50 mM GSH							Weed-free control, 100 mM GSH							Weed-free control, 150 mM GSH							Weed-free control, 200 mM GSH
	Samples	Total leaf area cm2	Green leaf area cm2	Green leaf area %	Dead leaf area cm2	Dead leaf area %		Samples	Total leaf area cm2	Green leaf area cm2	Green leaf area %	Dead leaf area cm2	Dead leaf area %		Samples	Total leaf area cm2	Green leaf area cm2	Green leaf area %	Dead leaf area cm2	Dead leaf area %		Samples	Total leaf area cm2	Green leaf area cm2	Green leaf area %	Dead leaf area cm2	Dead leaf area %		Samples	Total leaf area cm2	Green leaf area cm2	Green leaf area %	Dead leaf area cm2	Dead leaf area %
	1	25.959	25.923	99.8613	0.036	0.13868		1	13.312	11.631	87.3723	1.681	12.6277		1	6.529	5.674	86.9046	0.855	13.0954		1	12.212	9.459	77.4566	2.753	22.5434		1	1.981	1.132	57.1429	0.849	42.8571
	2	22.065	22.065	100	0	0		2	12.487	10.915	87.4109	1.572	12.5891		2	9.338	8.017	85.8535	1.321	14.1465		2	6.131	5.076	82.7924	1.055	17.2076		2	3.937	2.62	66.5481	1.317	33.4519
	3	27.993	27.874	99.5749	0.119	0.425106		3	5.821	5.237	89.9674	0.584	10.0326		3	7.403	6.523	88.1129	0.88	11.8871		3	5.845	4.613	78.9222	1.232	21.0778		3	5.937	3.566	60.064	2.371	39.936
	4	15.61	15.55	99.6156	0.06	0.384369		4	11.716	11.489	98.0625	0.227	1.93752		4	8.7	7.083	81.4138	1.617	18.5862		4	10.376	8.12	78.2575	2.256	21.7425		4	7.121	5.156	72.4056	1.965	27.5944
	5	28.673	28.643	99.8954	0.03	0.104628		5	11.885	11.864	99.8233	0.021	0.176693		5	9.028	7.146	79.1537	1.882	20.8463		5	6.107	4.697	76.9117	1.41	23.0883		5	4.688	2.507	53.477	2.181	46.523
	6	18.762	18.065	96.285	0.697	3.71496		6	11.606	10.996	94.7441	0.61	5.2559		6	8.553	7.57	88.507	0.983	11.493		6	14.491	11.457	79.0629	3.034	20.9371		6	6.543	3.784	57.8328	2.759	42.1672
	7	17.715	17.65	99.6331	0.065	0.366921		7	15.167	14.882	98.1209	0.285	1.87908		7	8.649	7.409	85.6631	1.24	14.3369		7	7.441	5.062	68.0285	2.379	31.9715		7	5.65	4.385	77.6106	1.265	22.3894
	8	21.164	20.512	96.9193	0.652	3.0807		8	11.473	10.307	89.837	1.166	10.163		8	11.766	10.967	93.2092	0.799	6.79075		8	9.122	8.129	89.1142	0.993	10.8858		8	6.998	4.561	65.1758	2.437	34.8242
	9	18.518	18.2	98.2828	0.318	1.71725		9	8.506	8.206	96.4731	0.3	3.52692		9	5.164	4.04	78.2339	1.124	21.7661		9	14.851	12.81	86.2568	2.041	13.7432		9	6.724	4.639	68.9917	2.085	31.0083
	10	23.118	23.118	100	0	0		10	11.26	9.711	86.2433	1.549	13.7567		10	8.422	7.002	83.1394	1.42	16.8606		10	12.738	10.721	84.1655	2.017	15.8345		10	4.502	2.728	60.5953	1.774	39.4047
	11	19.058	19.058	100	0	0		11	14.309	13.839	96.7154	0.47	3.28465		11	10.951	10.107	92.2929	0.844	7.70706		11	5.082	2.748	54.0732	2.334	45.9268		11	3.475	1.562	44.9496	1.913	55.0504
	12	22.812	22.629	99.1978	0.183	0.802209		12	11.724	11.556	98.567	0.168	1.43296		12	10.81	9.961	92.1462	0.849	7.85384		12	9.652	7.194	74.5338	2.458	25.4662		12	3.52	1.709	48.5511	1.811	51.4489
	13	18.502	18.502	100	0	0		13	12.976	12.31	94.8674	0.666	5.13255		13	9.655	7.916	81.9886	1.739	18.0114		13	8.605	7.154	83.1377	1.451	16.8623		13	6.285	3.727	59.2999	2.558	40.7001
	14	18.02	17.846	99.0344	0.174	0.965594		14	13.716	12.552	91.5136	1.164	8.48644		14	14.162	13.118	92.6282	1.044	7.37184		14	12.34	10.466	84.8136	1.874	15.1864		14	2.138	1.242	58.0917	0.896	41.9083
	15	19.04	18.939	99.4695	0.101	0.530462		15	12.062	11.91	98.7398	0.152	1.26016		15	10.671	9.347	87.5925	1.324	12.4075		15	5.138	3.529	68.6843	1.609	31.3157		15	4.079	2.751	67.443	1.328	32.557
	16	18.664	18.612	99.7214	0.052	0.278611		16	11.028	10.669	96.7446	0.359	3.25535		16	11.171	10.373	92.8565	0.798	7.1435		16	10.877	8.967	82.44	1.91	17.56		16	5.203	3.173	60.984	2.03	39.016
	17	17.329	17.329	100	0	0		17	10.098	9.244	91.5429	0.854	8.45712		17	8.235	6.928	84.1287	1.307	15.8713		17	4.676	3.199	68.4132	1.477	31.5868		17	3.963	2.618	66.0611	1.345	33.9389
	18	15.27	15.193	99.4957	0.077	0.504257		18	11.259	11.01	97.7884	0.249	2.21156		18	11.613	9.531	82.0718	2.082	17.9282		18	8.39	6.141	73.1943	2.249	26.8057		18	5.187	3.769	72.6624	1.418	27.3376
	Average	20.4596	20.3171	99.277	0.142444	0.722986		Average	11.6892	11.0182	94.1408	0.670944	5.85922		Average	9.49	8.26178	86.4387	1.22822	13.5613		Average	9.11522	7.19678	77.2366	1.91844	22.7634		Average	4.88506	3.0905	62.1048	1.79456	37.8952
	SE	0.924527	0.929733	0.252532	0.0496257	0.252532		SE	0.498796	0.498791	1.05466	0.126286	1.05466		SE	0.500452	0.509287	1.14688	0.0931573	1.14688		SE	0.77528	0.711854	1.99998	0.136575	1.99998		SE	0.369835	0.283598	1.98502	0.13238	1.98502
		Biological low R:FR, MES buffer							Biological low R:FR, 50 mM GSH							Biological low R:FR, 100 mM GSH							Biological low R:FR, 150 mM GSH							Biological low R:FR, 200 mM GSH
	Samples	Total leaf area cm2	Green leaf area cm2	Green leaf area %	Dead leaf area cm2	Dead leaf area %		Samples	Total leaf area cm2	Green leaf area cm2	Green leaf area %	Dead leaf area cm2	Dead leaf area %		Samples	Total leaf area cm2	Green leaf area cm2	Green leaf area %	Dead leaf area cm2	Dead leaf area %		Samples	Total leaf area cm2	Green leaf area cm2	Green leaf area %	Dead leaf area cm2	Dead leaf area %		Samples	Total leaf area cm2	Green leaf area cm2	Green leaf area %	Dead leaf area cm2	Dead leaf area %
	1	16.131	16.131	100	0	0		1	8.354	7.375	88.2811	0.979	11.7189		1	3.495	2.921	83.5765	0.574	16.4235		1	6.021	3.464	57.532	2.557	42.468		1	1.907	1.273	66.7541	0.634	33.2459
	2	18.466	18.141	98.24	0.325	1.75999		2	6.998	6.394	91.369	0.604	8.63104		2	3.14	2.585	82.3248	0.555	17.6752		2	5.952	2.607	43.8004	3.345	56.1996		2	1.448	0.318	21.9613	1.13	78.0387
	3	21.61	21.429	99.1624	0.181	0.837575		3	4.445	3.849	86.5917	0.596	13.4083		3	3.396	2.424	71.3781	0.972	28.6219		3	4.446	3.314	74.5389	1.132	25.4611		3	1.899	0.662	34.8605	1.237	65.1395
	4	25.054	24.322	97.0783	0.732	2.92169		4	4.784	3.688	77.0903	1.096	22.9097		4	4.051	3.274	80.8196	0.777	19.1804		4	1.87	0.278	14.8663	1.592	85.1337		4	1.562	1.013	64.8528	0.549	35.1472
	5	13.1	12.925	98.6641	0.175	1.33588		5	6.837	5.369	78.5286	1.468	21.4714		5	2.627	1.568	59.6879	1.059	40.3121		5	3.686	1.826	49.5388	1.86	50.4612		5	1.543	0.25	16.2022	1.293	83.7978
	6	17.4	17.016	97.7931	0.384	2.2069		6	5.691	5.504	96.7141	0.187	3.28589		6	1.977	1.419	71.7754	0.558	28.2246		6	3.594	2.393	66.5832	1.201	33.4168		6	1.116	0.08	7.16846	1.036	92.8315
	7	15.067	14.792	98.1748	0.275	1.82518		7	5.188	4.931	95.0463	0.257	4.95374		7	2.808	2.653	94.4801	0.155	5.51994		7	3.428	2.394	69.8366	1.034	30.1634		7	1.249	0.441	35.3082	0.808	64.6918
	8	18.667	18.171	97.3429	0.496	2.6571		8	5.088	4.679	91.9615	0.409	8.03852		8	3.457	2.638	76.3089	0.819	23.6911		8	3.448	1.589	46.0847	1.859	53.9153		8	1.377	0.269	19.5352	1.108	80.4648
	9	23.392	22.945	98.0891	0.447	1.91091		9	5.464	4.753	86.9876	0.711	13.0124		9	4.518	3.819	84.5286	0.699	15.4714		9	2.498	1.58	63.2506	0.918	36.7494		9	2.447	0.704	28.7699	1.743	71.2301
	10	20.403	20.318	99.5834	0.085	0.416605		10	3.585	2.97	82.8452	0.615	17.1548		10	5.504	4.783	86.9004	0.721	13.0996		10	4.942	3.868	78.2679	1.074	21.7321		10	2.331	1.118	47.9622	1.213	52.0378
	11	14.426	14.203	98.4542	0.223	1.54582		11	4.109	4.049	98.5398	0.06	1.46021		11	3.448	2.501	72.5348	0.947	27.4652		11	5.538	3.56	64.2831	1.978	35.7169		11	1.823	0.897	49.2046	0.926	50.7954
	12	16.064	15.937	99.2094	0.127	0.790588		12	7.956	7.24	91.0005	0.716	8.9995		12	4.102	2.771	67.5524	1.331	32.4476		12	3.15	1.893	60.0952	1.257	39.9048		12	1.393	0.217	15.5779	1.176	84.4221
	13	18.969	18.764	98.9193	0.205	1.08071		13	4.068	3.712	91.2488	0.356	8.75123		13	2.539	1.874	73.8086	0.665	26.1914		13	1.654	0.569	34.4015	1.085	65.5985		13	4.011	3.539	88.2324	0.472	11.7676
	14	17.432	16.996	97.4989	0.436	2.50115		14	5.493	5.418	98.6346	0.075	1.36537		14	3.522	2.924	83.021	0.598	16.979		14	5.736	3.983	69.4386	1.753	30.5614		14	1.131	0.103	9.10698	1.028	90.893
	15	17.604	17.003	96.586	0.601	3.414		15	6.064	5.533	91.2434	0.531	8.7566		15	3.966	3.191	80.4589	0.775	19.5411		15	3.114	2.322	74.5665	0.792	25.4335		15	1.674	0.285	17.0251	1.389	82.9749
	16	10.539	10.539	100	0	0		16	8.229	7.765	94.3614	0.464	5.6386		16	2.696	2.112	78.3383	0.584	21.6617		16	4.956	3.109	62.732	1.847	37.268		16	1.279	0.17	13.2916	1.109	86.7084
	17	9.835	9.542	97.0208	0.293	2.97916		17	4.589	4.369	95.2059	0.22	4.79407		17	1.581	0.592	37.4447	0.989	62.5553		17	5.231	4.013	76.7157	1.218	23.2843		17	1.947	0.996	51.1556	0.951	48.8444
	18	13.019	12.948	99.4546	0.071	0.545357		18	4.524	4.108	90.8046	0.416	9.1954		18	5.267	4.008	76.0964	1.259	23.9036		18	4.682	3.995	85.3268	0.687	14.6732		18	1.848	0.812	43.9394	1.036	56.0606
	Average	17.0654	16.7846	98.404	0.280889	1.59603		Average	5.637	5.09478	90.3586	0.542222	9.64143		Average	3.44967	2.66983	75.6131	0.779833	24.3869		Average	4.10811	2.59761	60.6588	1.5105	39.3412		Average	1.77694	0.730389	35.0505	1.04656	64.9495
	SE	0.963602	0.938473	0.246687	0.0481983	0.246687		SE	0.347739	0.323517	1.4523	0.0859776	1.4523		SE	0.242338	0.232135	2.91813	0.0663879	2.91813		SE	0.322083	0.27261	4.12224	0.157952	4.12224		SE	0.158864	0.187982	5.3815	0.0720254	5.3815
		Artificial low R:FR, MES buffer							Artificial low R:FR, 50 mM GSH							Artificial low R:FR, 100 mM GSH							Artificial low R:FR, 150 mM GSH							Artificial low R:FR, 200 mM GSH
	Samples	Total leaf area cm2	Green leaf area cm2	Green leaf area %	Dead leaf area cm2	Dead leaf area %		Samples	Total leaf area cm2	Green leaf area cm2	Green leaf area %	Dead leaf area cm2	Dead leaf area %		Samples	Total leaf area cm2	Green leaf area cm2	Green leaf area %	Dead leaf area cm2	Dead leaf area %		Samples	Total leaf area cm2	Green leaf area cm2	Green leaf area %	Dead leaf area cm2	Dead leaf area %		Samples	Total leaf area cm2	Green leaf area cm2	Green leaf area %	Dead leaf area cm2	Dead leaf area %
	1	27.189	27.189	100	0	0.132406		1	10.579	8.964	84.7339	1.615	15.2661		1	4.393	3.042	69.2465	1.351	30.7535		1	12.014	7.922	65.9397	4.092	34.0603		1	7.132	5.451	76.4302	1.681	23.5698
	2	23.087	23.017	99.6968	0.07	0		2	8.258	7.407	89.6948	0.851	10.3052		2	6.868	5.405	78.6983	1.463	21.3017		2	14.554	12.531	86.1	2.023	13.9		2	3.019	1.556	51.5402	1.463	48.4598
	3	22.048	22.01	99.8276	0.038	0.539731		3	8.614	7.409	86.0111	1.205	13.9889		3	5.859	4.767	81.362	1.092	18.638		3	11.799	8.771	74.3368	3.028	25.6632		3	2.194	0.54	24.6126	1.654	75.3874
	4	26.696	26.5	99.2658	0.196	0.224753		4	7.633	6.075	79.5886	1.558	20.4114		4	8.404	6.756	80.3903	1.648	19.6097		4	15.626	11.867	75.9439	3.759	24.0561		4	4.509	2.047	45.3981	2.462	54.6019
	5	28.096	28.096	100	0	0.106777		5	10.813	9.723	89.9195	1.09	10.0805		5	7.138	5.791	81.1292	1.347	18.8708		5	13.889	10.647	76.6578	3.242	23.3422		5	2.861	1.527	53.3729	1.334	46.6271
	6	25.04	24.994	99.8163	0.046	2.78355		6	3.284	2.48	75.5177	0.804	24.4823		6	9.238	7.401	80.1147	1.837	19.8853		6	4.035	1.663	41.2144	2.372	58.7856		6	1.908	0.361	18.9203	1.547	81.0797
	7	22.35	22.283	99.7002	0.067	0.290828		7	8.581	7.923	92.3319	0.658	7.6681		7	7.695	6.681	86.8226	1.014	13.1774		7	14.568	11.115	76.2974	3.453	23.7026		7	4.736	2.27	47.9307	2.466	52.0693
	8	24.907	24.907	100	0	2.61774		8	9.973	8.831	88.5491	1.142	11.4509		8	7.786	5.775	74.1716	2.011	25.8284		8	10.284	7.195	69.963	3.089	30.037		8	4.401	2.579	58.6003	1.822	41.3997
	9	20.445	20.445	100	0	1.55539		9	7.374	6.086	82.5332	1.288	17.4668		9	8.949	7.7	86.0431	1.249	13.9569		9	6.901	4.42	64.0487	2.481	35.9513		9	9.902	7.812	78.8932	2.09	21.1068
	10	23.568	23.542	99.8897	0.026	0		10	7.045	5.856	83.1228	1.189	16.8772		10	9.147	7.543	82.4642	1.604	17.5358		10	5.447	2.771	50.872	2.676	49.128		10	1.55	0.322	20.7742	1.228	79.2258
	11	22.825	22.825	100	0	0		11	10.608	9.68	91.2519	0.928	8.74811		11	11.58	9.814	84.7496	1.766	15.2504		11	7.114	5.085	71.4788	2.029	28.5212		11	4.667	2.874	61.5813	1.793	38.4187
	12	25.192	25.132	99.7618	0.06	0.726421		12	7.689	6.998	91.0131	0.691	8.98686		12	7.605	6.36	83.6292	1.245	16.3708		12	7.427	5.909	79.5611	1.518	20.4389		12	2.737	0.481	17.574	2.256	82.426
	13	21.751	21.697	99.7517	0.054	0		13	6.28	5.622	89.5223	0.658	10.4777		13	7.663	6.723	87.7333	0.94	12.2667		13	9.758	7.987	81.8508	1.771	18.1492		13	5.586	3.569	63.8919	2.017	36.1081
	14	19.876	19.876	100	0	0.875428		14	6.935	6.105	88.0317	0.83	11.9683		14	5.754	4.629	80.4484	1.125	19.5516		14	14.393	11.218	77.9407	3.175	22.0593		14	5.339	3.41	63.8696	1.929	36.1304
	15	27.432	27.432	100	0	0.368183		15	8.855	7.876	88.9441	0.979	11.0559		15	9.148	7.368	80.5422	1.78	19.4578		15	9.866	8.704	88.2222	1.162	11.7778		15	7.018	5.018	71.5019	2	28.4981
	16	26.379	26.379	100	0	0.197127		16	8.394	8.094	96.426	0.3	3.57398		16	5.564	3.962	71.2078	1.602	28.7922		16	5.818	3.727	64.0598	2.091	35.9402		16	1.745	0.273	15.6447	1.472	84.3553
	17	23.645	23.258	98.3633	0.387	0		17	6.887	5.999	87.1061	0.888	12.8939		17	3.802	2.296	60.3893	1.506	39.6107		17	11.138	8.105	72.7689	3.033	27.2311		17	7.26	6.292	86.6667	0.968	13.3333
	18	28.351	28.351	100	0	0.271595		18	12.444	11.758	94.4873	0.686	5.5127		18	7.341	5.255	71.5843	2.086	28.4157		18	10.425	7.989	76.6331	2.436	23.3669		18	2.971	1.504	50.6227	1.467	49.3773
	Average	24.3821	24.3296	99.7819	0.0524444	0.593885		Average	8.347	7.38256	87.7103	0.964444	12.2897		Average	7.44078	5.95933	78.9292	1.48144	21.0708		Average	10.2809	7.64589	71.8827	2.635	28.1173		Average	4.41861	2.66033	50.4347	1.75828	49.5653
	SE	0.613161	0.614816	0.0945756	0.0227819	0.203474		SE	0.490482	0.485382	1.22035	0.0784132	1.22035		SE	0.448237	0.429073	1.66847	0.0795431	1.66847		SE	0.835368	0.752972	2.73922	0.185858	2.73922		SE	0.544067	0.525755	5.32172	0.0975996	5.32172
A summary of Arabidopsis cell death response to increasing concentrations of GSH in the weed-free control, biological and artificial low R:FR treatments
For ease of comparison, the data for dead leaf area % for each GSH concentartion are displayed in the weed-free control, biological and artificial low R:FR treatments
			Dead leaf area % in MES treatment							Dead leaf area % in 50 mM GSH treatment							Dead leaf area % in 100 mM GSH treatment							Dead leaf area % in 150 mM GSH treatment							Dead leaf area % in 200 mM GSH treatment
	Samples	Weed-free control	Biological low R:FR	Artificial low R:FR				Samples	Weed-free control	Biological low R:FR	Artificial low R:FR				Samples	Weed-free control	Biological low R:FR	Artificial low R:FR				Samples	Weed-free control	Biological low R:FR	Artificial low R:FR				Samples	Weed-free control	Biological low R:FR	Artificial low R:FR
	1	0.13868	0	0.132406				1	12.6277	11.7189	15.2661				1	13.0954	16.4235	30.7535				1	22.5434	42.468	34.0603				1	42.8571	33.2459	23.5698
	2	0	1.75999	0				2	12.5891	8.63104	10.3052				2	14.1465	17.6752	21.3017				2	17.2076	56.1996	13.9				2	33.4519	78.0387	48.4598
	3	0.425106	0.837575	0.539731				3	10.0326	13.4083	13.9889				3	11.8871	28.6219	18.638				3	21.0778	25.4611	25.6632				3	39.936	65.1395	75.3874
	4	0.384369	2.92169	0.224753				4	1.93752	22.9097	20.4114				4	18.5862	19.1804	19.6097				4	21.7425	85.1337	24.0561				4	27.5944	35.1472	54.6019
	5	0.104628	1.33588	0.106777				5	0.176693	21.4714	10.0805				5	20.8463	40.3121	18.8708				5	23.0883	50.4612	23.3422				5	46.523	83.7978	46.6271
	6	3.71496	2.2069	2.78355				6	5.2559	3.28589	24.4823				6	11.493	28.2246	19.8853				6	20.9371	33.4168	58.7856				6	42.1672	92.8315	81.0797
	7	0.366921	1.82518	0.290828				7	1.87908	4.95374	7.6681				7	14.3369	5.51994	13.1774				7	31.9715	30.1634	23.7026				7	22.3894	64.6918	52.0693
	8	3.0807	2.6571	2.61774				8	10.163	8.03852	11.4509				8	6.79075	23.6911	25.8284				8	10.8858	53.9153	30.037				8	34.8242	80.4648	41.3997
	9	1.71725	1.91091	1.55539				9	3.52692	13.0124	17.4668				9	21.7661	15.4714	13.9569				9	13.7432	36.7494	35.9513				9	31.0083	71.2301	21.1068
	10	0	0.416605	0				10	13.7567	17.1548	16.8772				10	16.8606	13.0996	17.5358				10	15.8345	21.7321	49.128				10	39.4047	52.0378	79.2258
	11	0	1.54582	0				11	3.28465	1.46021	8.74811				11	7.70706	27.4652	15.2504				11	45.9268	35.7169	28.5212				11	55.0504	50.7954	38.4187
	12	0.802209	0.790588	0.726421				12	1.43296	8.9995	8.98686				12	7.85384	32.4476	16.3708				12	25.4662	39.9048	20.4389				12	51.4489	84.4221	82.426
	13	0	1.08071	0				13	5.13255	8.75123	10.4777				13	18.0114	26.1914	12.2667				13	16.8623	65.5985	18.1492				13	40.7001	11.7676	36.1081
	14	0.965594	2.50115	0.875428				14	8.48644	1.36537	11.9683				14	7.37184	16.979	19.5516				14	15.1864	30.5614	22.0593				14	41.9083	90.893	36.1304
	15	0.530462	3.414	0.368183				15	1.26016	8.7566	11.0559				15	12.4075	19.5411	19.4578				15	31.3157	25.4335	11.7778				15	32.557	82.9749	28.4981
	16	0.278611	0	0.197127				16	3.25535	5.6386	3.57398				16	7.1435	21.6617	28.7922				16	17.56	37.268	35.9402				16	39.016	86.7084	84.3553
	17	0	2.97916	0				17	8.45712	4.79407	12.8939				17	15.8713	62.5553	39.6107				17	31.5868	23.2843	27.2311				17	33.9389	48.8444	13.3333
	18	0.504257	0.545357	0.271595				18	2.21156	9.1954	5.5127				18	17.9282	23.9036	28.4157				18	26.8057	14.6732	23.3669				18	27.3376	56.0606	49.3773
	Average	0.722986	1.59603	0.593885				Average	5.85922	9.64143	12.2897				Average	13.5613	24.3869	21.0708				Average	22.7634	39.3412	28.1173				Average	37.8952	64.9495	49.5653
	SE	0.252532	0.246687	0.203474				SE	1.05466	1.4523	1.22035				SE	1.14688	2.91813	1.66847				SE	1.99998	4.12224	2.73922				SE	1.98502	5.3815	5.32172
