# Supplementary material for: Plant competition cues activate a singlet oxygen signaling pathway in Arabidopsis thaliana
Source: Front Plant Sci. 2024 Aug 20;15:964476. doi: 10.3389/fpls.2024.964476 (PMC11368760; doi:10.3389/fpls.2024.964476)
Supplement: Supplementary Table 4 — Expression profiles of 1O2-responsive genes in the biological and artificial low R:FR treatments. [file Table4.xlsx]

## Sheet: Sheet1
Early singlet oxygen-responsive genes that were upregulated in the biological and artificial low R:FR light treatments.
Only six genes were consistently upregulated in the biological low R:FR and artificial low R:FR treatments, and four previous studies (highlighted in yellow).
op den Camp et al., 2003; Gadjev et al., 2006; Alboresi et al., 2011; Mor et al., 2014
Accession no.	Gene	Description	Log2FC; Biological low R:FR	Log2FC; Artificial low R:FR	Padj	GO Biological Process
At1g79720		Eukaryotic aspartyl protease family protein	0.625646	0.0334335	0.0249995	growth
At3g10720		Invertase; pectin methylesterase inhibitor	1.18115	0.241419	0.00351613	cellular lipid metabolic process, defense response to bacterium, defense response to fungus, growth, monocarboxylic acid metabolic process, pigment biosynthetic process, regulation of defense response, response to blue light, response to lipid, response to wounding, root development
At3g19380	PUB25	E3 ubiquitin ligase	0.746863	0.340141	0.00223	defense response to other organism, protein ubiquitination
At4g01330		Protein kinase superfamily protein	0.704349	0.201223	0.0260072	growth, response to light intensity, protein phosphorylation
At4g01870		tolB protein-like protein	0.733945	0.0152164	0.0160079	camalexin biosynthetic process, cellular response to lipid, defense response to bacterium, defense response to fungus, leaf senescence, monocarboxylic acid metabolic process, regulation of defense response, response to abscisic acid, response to jasmonic acid, response to light intensity, response to salt stress, response to water, signal transduction
At5g57560	TCH4	a cell wall-modifying enzyme	1.63545	0.0675144	0.018897	cell wall biogenesis, xyloglucan metabolic process, cellular response to hypoxia, plant-type cell wall organization, response to auxin, response to brassinosteroid, response to cold, response to heat, response to mechanical stimulus
At1g26210	SOFL1	SOB five-like 1; positive regulator of cytokinin levels	0.71554	0.140144	0.0194673	cytokinin metabolic process, developmental process
At1g44350	ILL6	IAA amino acid conjugate hydrolase	3.25761	0.0913057	0.00255295	auxin metabolic process, jasmonic acid metabolic process, regulation of systemic acquired resistance, response to jasmonic acid
AT5G24810	ABC1K11	ABC1 family protein	0.974271	0.0923087	0.0121228	cellular catabolic process, cellular response to lipid, defense response to bacterium, defense response to fungus, developmental growth, epigenetic regulation of gene expression, flower development, organic acid metabolic process, regulation of developmental process, response to inorganic substance, response to osmotic stress, response to wounding, signal transduction
AT4G32280	IAA29	indole-3-acetic acid inducible 29	1.21255	0.0835889	0.0174269	response to auxin, response to cyclopentenone, response to far red light, response to herbicide, response to red light, regulation of DNA-templated transcription
AT1G21050		MIZU-KUSSEI-like protein	1.26238	0.170654	0.00355737	defense response to fungus, photosynthesis, light reaction, regulation of post-embryonic development, response to bacterium, response to organic cyclic compound, response to red or far red light, response to wounding, small molecule biosynthetic process, hydrotropism
AT1G69160	BGL1	Big grain like 1; suppressor	0.754205	0.0722573	0.0154325	cellular response to oxygen-containing compound, developmental growth, glucosinolate metabolic process, regulation of growth, response to auxin, response to brassinosteroid, response to lipid, response to low light intensity stimulus, response to organic cyclic compound, response to red or far red light
AT4G12980		Auxin responsive family protein	0.795054	0.148928	0.0398782	chlorophyll biosynthetic process, macromolecule biosynthetic process, response to auxin, response to light stimulus, tissue development
Early singlet oxygen-responsive genes (in four previous studies) that were upregulated in the biological low R:FR treatment and downregulated in the artificial low R:FR light treatment.
op den Camp et al., 2003; Gadjev et al., 2006; Alboresi et al., 2011; Mor et al., 2014
Accession no.	Gene	Description	Log2FC; Biological low R:FR	Log2FC; Artificial low R:FR	Padj	GO Biological Process
At2g34930		disease resistance family protein	0.515927	-0.0915394	0.00144608	defense response to fungus, response to oomycetes, signal transduction
At2g02950	PKS1	phytochrome kinase substrate 1 which can bind to PHYA oe PHYB	0.480429	-0.370202	1.83e-05	phototropism, positive gravitropism, red or far-red light signaling pathway, red, far-red light phototransduction, response to far red light, response to red light
At2g18700	TPS11	trehalose phosphatase/synthase 11	1.05969	-0.00718466	0.00851805	trehalose biosynthetic process, trehalose metabolism in response to stress
At2g36430		putative transmembrane protein	0.555033	-0.31641	7.03e-05	cellular component assembly, defense response to bacterium, regulation of defense response, response to light stimulus, signal transduction
At1g26800	MPSR1	Cytoplasmic misfolded protein sensing ring E3 ligase 1	1.58982	-0.077121	1.41e-05	cellular response to hypoxia, cellular response to misfolded protein
At1g69260	AFP1	ABI five binding protein	0.629879	-0.0646674	0.00958064	abscisic acid-activated signaling pathway
At3g07390	AIR12	Auxin-induced in root cultures 12	0.534209	-0.460935	3.41e-09	extracellular matrix organization, lateral root morphogenesis, response to auxin
At3g02380	COL2	Zinc finger protein	0.472818	-0.201311	0.000237243	chloroplast organization, regulation of flower development
At4g29780		Nuclease	0.611591	-0.110673	0.00181257	cellular response to hormone stimulus, cellular response to hypoxia, cellular response to oxygen-containing compound, cellular response to salicylic acid stimulus, defense response to bacterium, defense response to fungus, hormone-mediated signaling pathway, organic acid metabolic process, protein modification process, regulation of DNA-templated transcription, regulation of cellular ketone metab…
At3g54150		S-adenosyl-L-methionine-dependent methyltransferases superfamily protein	0.411749	-0.661893	0.000184156	callus formation, pollen exine formation, pollen germination
At5g01600	FER1	Chloroplast targeted ferretin protein	0.428813	-0.0776645	0.00749271	flower development, iron ion transport, leaf development, multicellular organismal-level iron ion homeostasis, photosynthesis, response to bacterium, response to cold, response to hydrogen peroxide, response to iron ion, response to reactive oxygen species, response to zinc ion
At5g01540	LECRKA4.1	Lectin recepter kinase	0.467932	-0.383814	4.17e-05	abscisic acid-activated signaling pathway, defense response to bacterium, pattern recognition receptor signaling pathway, response to abscisic acid, seed germination
At5g22630	ADT5	Plastid-localized arogenate dehydratase	0.592166	-0.167646	0.000225886	defense response, L-phenylalanine biosynthetic process
At5g51550	EXL3	Exordium like 3	0.564502	-0.389638	0.000123342	RNA metabolic process, carboxylic acid metabolic process, fatty acid metabolic process, growth, meristem development, response to light stimulus, response to organic cyclic compound, root system development, shoot system morphogenesis, tissue development
At5g61600	ERF104	Ethylene response factor	0.533549	-1.10176	1.14e-07	cell division, defense response to fungus, phloem or xylem histogenesis, positive regulation of DNA-templated transcription
At1g74930	ORA47	Integrase-type DNA-binding superfamily protein	0.520896	-0.771521	2e-06	cell division, defense response to insect, phloem or xylem histogenesis, response to wounding
At1g06260		cysteine proteinases superfamily protein	0.673247	-0.147773	0.000261094	proteolysis involved in protein catabolic process
At2g23770	LYK4	Protein kinase family protein	1.41597	-0.105316	4.09e-07	innate immune response, cellular response to chitin, cellular response to molecule of bacterial origin, protein phosphorylation
At2g11240		Transposable element gene	0.906166	-0.28048	2.38e-09	non-LTR retrotransposon family (LINE)
At2g35820		Ureidoglycolate hydrolase	0.804199	-0.0393664	2.58e-05	protein-containing complex assembly
At5g13700	PAO1	Encodes a protein with polyamine oxidase activity	0.488721	-0.0415376	0.0158591	polyamine catabolic process, spermine catabolic process
AT2G42870	PAR1	Encodes phytochrome rapidly regulated 1	1.19861	-0.144783	3.29e-06	developmental process, negative regulation of DNA-templated transcription, shade avoidance
AT1G56220		Auxin assiciated family protein	0.580937	-0.142097	0.00172046	alpha-amino acid metabolic process, cellular catabolic process, organonitrogen compound catabolic process, response to light intensity, vitamin metabolic process
AT2G30930		hypothetical protein	0.823566	-0.170303	0.000229891	cell differentiation, defense response to bacterium, developmental growth, plant epidermis development, response to lipid, response to organic cyclic compound, root morphogenesis
AT1G28330	DYL1	dormancy associated protein	1.65202	-2.19174	1.79e-08	response to fructose, response to glucose, response to sucrose
AT1G78270	UGT85A4	UDP-glucosyl transferase	0.585735	-0.176105	2.26e-05	glucuronosyltransferase activity, quercetin 3-O-glucosyltransferase activity, quercetin 7-O-glucosyltransferase activity
AT3G53950		glyoxal oxidase-related protein	0.837891	-0.353537	3.66e-08	macromolecule biosynthetic process
Early singlet oxygen-responsive genes (in four previous studies) that were downregulated in the biological low R:FR treatment and upregulated in the artificial low R:FR light treatment.
op den Camp et al., 2003; Gadjev et al., 2006; Alboresi et al., 2011; Mor et al., 2014
Accession no.	Gene	Description	Log2FC; Biological low R:FR	Log2FC; Artificial low R:FR	Padj	GO Biological Process
At2g27420		cysteine proteinases superfamily protein	-1.06298	0.90054	2.48e-08	proteolysis involved in protein catabolic process
At1g74070		Cyclophilin-like peptidyl-proplyl cis-trans isomerase family protein	-0.745239	0.175869	0.000261094	RNA metabolic process, cellular nitrogen compound biosynthetic process, macromolecule biosynthetic process, macromolecule modification, organonitrogen compound biosynthetic process, oxoacid metabolic process, photosynthetic electron transport chain, protein metabolic process, response to cold, response to light intensity, response to light stimulus, secondary metabolite biosynthetic process, sulf…
At1g80840	WRKY40	WRKY DNA-binding protein 40	-0.548541	0.116707	0.00811078	defense response to bacterium, defense response to fungus, negative regulation of DNA-templated transcription, regulation of defense response, regulation of defense response to virus by host, response to molecule of bacterial origin, response to salicylic acid, response to wounding
At1g80760	NIP6;1	NOD26-like intrinsic protein 6;1; encodes a protein containing a boron transporter	-0.47302	0.0954928	0.0207134	borate transport, cellular response to boron-containing substance levels
At1g73600	NMT3	Encodes a phosphate and phosphite responsive enzyme, S-adenosyl-L-methionine-dependent phosphoethanolamine N-methyltransferase	-1.33455	0.675025	1.69e-13	diacylglycerol biosynthetic process, phosphatidylcholine biosynthetic process, phosphatidylethanolamine metabolic process, pollen development, triglyceride biosynthetic process
At3g28930	AIG2	Avirulence induced gene family protein	-0.540698	0.136842	0.00632862	defense response to bacterium, positive regulation of tryptophan metabolic process
At4g11000		Ankyrin repeat family protein	-0.725608	0.231465	0.000225886	cellular response to organic substance, cellular response to oxygen-containing compound, defense response to bacterium, defense response to fungus, monocarboxylic acid metabolic process, organic hydroxy compound metabolic process, regulation of cellular ketone metabolic process, regulation of defense response, response to inorganic substance, response to molecule of bacterial origin, response to …
At4g30610	BRS1	BRI1 suppressor 1; involved in brassinosteroiod signalling	-0.592534	0.0281	0.00942973	brassinosteroid mediated signaling pathway
At4g39030	EDS5	Involved in salicylic acid-dependent signalling	-0.57481	0.00809201	0.00620108	defense response, defense response to bacterium, negative regulation of defense response, response to nematode, salicylic acid biosynthetic process
At3g46640	PCL1	myb family transciption factor that is essential for circadian clock	-0.580628	1.0262	1.26e-10	circadian rhythm, regulation of DNA-templated transcription, regulation of gene expression
At5g02290	NAK	Protein kinase superfamily protein	-0.453923	0.314849	0.000483697	protein phosphorylation, defense response
At1g66510		AAR2 protein family	-0.619319	0.0812864	0.00935324	spliceosomal tri-snRNP complex assembly
At2g04040	DTX1	MATE efflux family protein	-0.551062	0.984604	2.59e-09	cadmium ion transport, xenobiotic detoxification by transmembrane export across the plasma membrane
At1g31200	PP2-A9	Phloem protein 2-A9	-0.584746	0.070715	0.0223441	carbohydrate binding
At1g23730	BCA3	Beta carbonic anhydrase 3	-0.663752	0.999327	9.65e-09	carbon utilization, plant epidermis development, response to abscisic acid, response to hypoxia, sulfur compound metabolic process
At3g46900	COPT2	Encodes a member of copper transporter family	-0.51046	1.54807	5.77e-10	copper ion import across plasma membrane
AT4G30530	GGP1	Class I glutamine amidotransferase-like superfamily	-1.14143	0.0705948	0.000307215	camalexin biosynthetic process, glucosinolate metabolic process
